# Supplementary material for: Sequencing of over 100,000 individuals identifies multiple genes and rare variants associated with Crohns disease susceptibility
Source: bioRxiv or medRxiv preprint supplement (doi:10.1101/2021.06.15.21258641), 2021-07-05

# QC overview

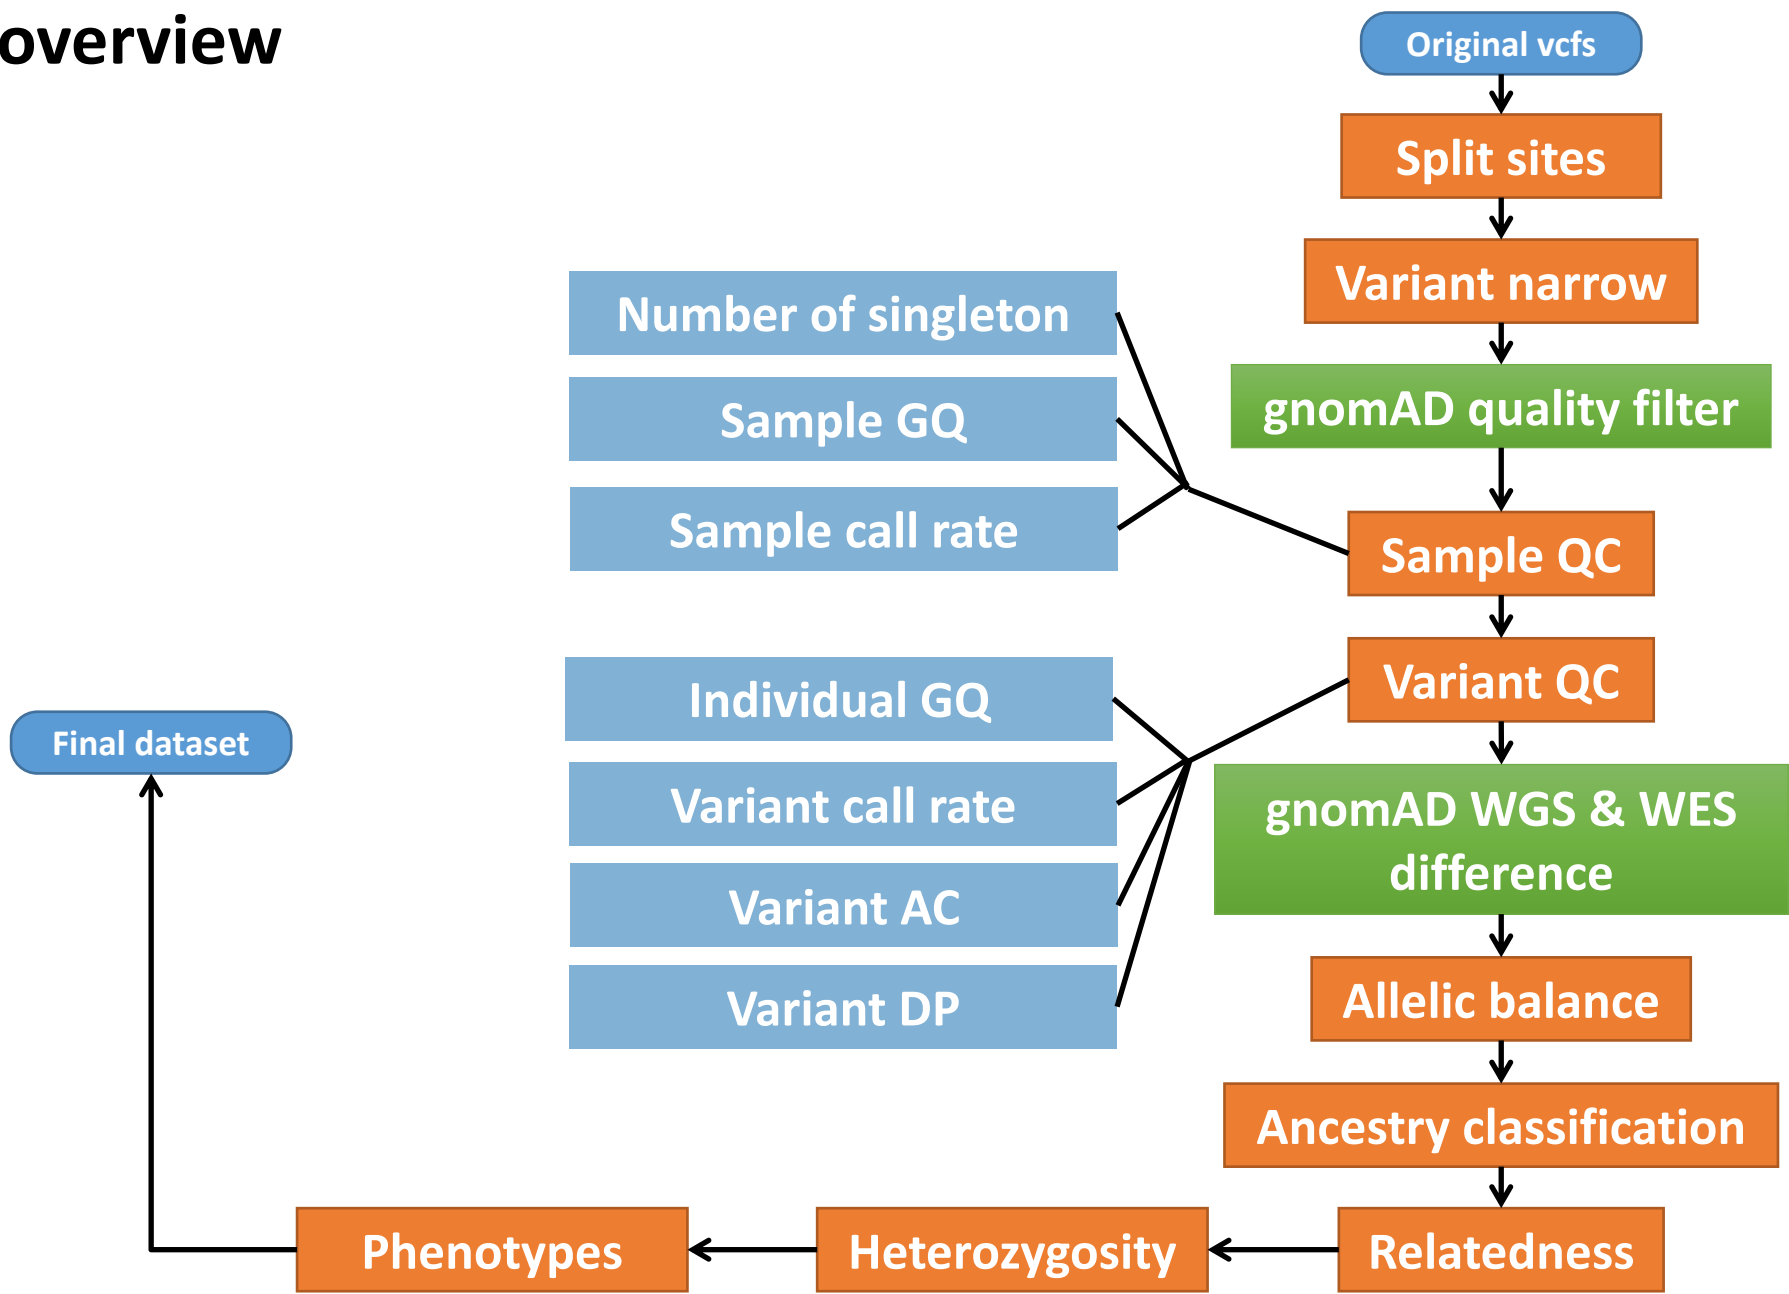

Supplement: Supplementary file [file media-1.pdf]
